# Supplementary material for: Use of social network analysis methods to study professional advice and performance among healthcare providers: a systematic review
Source: Syst Rev. 2017 Oct 23;6:208. doi: 10.1186/s13643-017-0597-1 (PMC5651641; doi:10.1186/s13643-017-0597-1)
Supplement: Supplementary file 1 — Search strategy concepts and associated terms. (XLSX 12 kb) [file 13643_2017_597_MOESM1_ESM.xlsx]

## Sheet: Search strategy
Additional File 1: Search strategy concepts and associated terms
Social network analysis	Diffusion of innovations	Knowledge translation & transfer
Social network	Diffusion of innovation*	Integrated knowledge translation
analysis method*	Diffusion or diffusivity	Knowledge mobili#ation
analysis technique*	characteristic*	Knowledge to action
approach	evidence	Transmission of knowledge
data	information	Knowledge
diagrams	innovation	utili#*
examin*	innovation adaptation	uptake
explor*	innovation adoption	transfer*
framework	knowledge	disseminati*
indicator	map	translation
information	measurement	broker
inquiry	model	exchange
interaction*	pathway*	generation
intervention	pattern*	integration
investigation*	process*	diffuse*
map*	propert*	Evidence
measure*	simulation*	exchange
method*	strateg*	transfer
metric	stud*	uptake
model	system*	utili#*
pattern	technique*	diffuse*
perspective	theor*	transl*
questionnaires	theory model*	implement*
software	Innovation	Data
structure*	adopt*	exchange
surveys	adaptation*	transfer
techniques	development process	transl*
theory	sharing	Research
tools	exchange	utili#*
Interprofessional relations	Program adopt*	transl*
Network intervention	Innovation adoption and diffusion	implement*
Sociometr* techniques	Innovation* in service delivery and organi#ation	Information
Sociogram*		dissemination
Sociomap*		exchange
Interprofessional relations		transfer
Network intervention		transl*
Network stud*		Organizational innovation
change agent*		Continuing education
opinion leader*		Policy
champion*		Quality improvement
knowledge broker		Total quality management
opinion leader*		Knowledge management
UCINET		Evidence-based practice
Social network analysis	Diffusion of innovations	Knowledge translation & transfer
full list of SNA software in example search strategy		Evidence-based medicine
		Guideline implementation
		Policy research
		Policies
		Participatory action research
		Effective dissemination
		Complex intervention
		Communit* of practice
		Applied dissemination
		Implementation science
		Action research
		Adoption
		Linkage and exchange
		Best practi?e
		Change
		Dissemination
		Evaluation
		Implementation
		Implementation research
		Information
		Innovation
		Institutionali#ation
		Service innovation
		Translational research
		Utili#ation
