# Supplementary material for: Use of social network analysis methods to study professional advice and performance among healthcare providers: a systematic review
Source: Syst Rev. 2017 Oct 23;6:208. doi: 10.1186/s13643-017-0597-1 (PMC5651641; doi:10.1186/s13643-017-0597-1)
Supplement: Supplementary file 2 — SNA software search strategy for each database. (XLSX 10 kb) [file 13643_2017_597_MOESM2_ESM.xlsx]

## Sheet: Software exclusions
Additional File 2: SNA software search strategy for each database
Database	Included	Excluded
Medline	UCINET, NetDraw, KrackPlot, NetMiner, StOCNET, GRADAP, NEGOPY, FATCAT, MultiNet, Agna, Blue Spider, DyNet, MDLogix Solutions, Network Workbench, Pajek, Sentinel Visualizer, SocNetV, visone, CID-ABM, C-IKNOW, Commetrix, MetaSight, Referral Web, SONIVIS, CiteSpace, E-Net, Ego Net, VennMaker, Financial Network Analyzer, PGRAPH, PermNet, CFinder, KeyPlayer, KliqFinder, Network Genie, ONA surveys, Nod…	SNAP, InFlow, STRUCTURE, ORA, Jung, UNISoN, Puck, Blanche, Pnet and ORS
EMBASE	UCINET, NetDraw, KrackPlot, NetMiner, StOCNET, GRADAP, NEGOPY, FATCAT, MultiNet, Agna, Blue Spider, DyNet, MDLogix Solutions, Network Workbench, Pajek, Sentinel Visualizer, SocNetV, visone, CID-ABM, C-IKNOW, Commetrix, MetaSight, Referral Web, SONIVIS, CiteSpace, E-Net, Ego Net, VennMaker, Financial Network Analyzer, PGRAPH, PermNet, CFinder, KeyPlayer, KliqFinder, Network Genie, ONA surveys, Nod…	SNAP, InFlow, STRUCTURE, ORA, Jung, UNISoN, Puck, Blanche, Pnet and ORS
PsychInfo	UCINET, NetDraw, KrackPlot, NetMiner, StOCNET, GRADAP, NEGOPY, FATCAT, MultiNet, Agna, Blue Spider, DyNet, MDLogix Solutions, Network Workbench, Pajek, Sentinel Visualizer, SocNetV, visone, CID-ABM, C-IKNOW, Commetrix, MetaSight, Referral Web, SONIVIS, CiteSpace, E-Net, Ego Net, VennMaker, Financial Network Analyzer, PGRAPH, PermNet, PNet, CFinder, KeyPlayer, KliqFinder, Network Genie, ONA survey…	SNAP, InFlow, STRUCTURE, ORA, Jung, UNISoN, Puck, Blanche and ORS
CINAHL	UCINET, NetDraw, KrackPlot, NetMiner, StOCNET, GRADAP, NEGOPY, FATCAT, MultiNet, Agna, Blue Spider, DyNet, MDLogix Solutions, Network Workbench, ORA, Pajek, Sentinel Visualizer, SocNetV, visone, CID-ABM, C-IKNOW, Commetrix, MetaSight, Referral Web, SONIVIS, UNISoN, CiteSpace, E-Net, Ego Net, VennMaker, Financial Network Analyzer, PGRAPH, Puck, Blanche, PermNet, PNet, CFinder, KeyPlayer, KliqFinde…	SNAP, InFlow, STRUCTURE and ORS
Global Health	UCINET, NetDraw, KrackPlot, NetMiner, StOCNET, GRADAP, NEGOPY, FATCAT, MultiNet, Agna, Blue Spider, DyNet, MDLogix Solutions, Network Workbench, Pajek, Sentinel Visualizer, SocNetV, visone, CID-ABM, C-IKNOW, Commetrix, MetaSight, Referral Web, SONIVIS, CiteSpace, E-Net, Ego Net, VennMaker, Financial Network Analyzer, PGRAPH, PermNet, CFinder, KeyPlayer, KliqFinder, Network Genie, ONA surveys, Nod…	SNAP, InFlow, STRUCTURE, ORA, Jung, UNISoN, Puck, Blanche, Pnet and ORS
Social Policy and Practice	UCINET, NetDraw, KrackPlot, NetMiner, StOCNET, GRADAP, NEGOPY, FATCAT, MultiNet, Agna, Blue Spider, DyNet, MDLogix Solutions, Network Workbench, Pajek, Sentinel Visualizer, SocNetV, visone, CID-ABM, C-IKNOW, Commetrix, MetaSight, Referral Web, SONIVIS, UNISon, CiteSpace, E-Net, Ego Net, VennMaker, Financial Network Analyzer, PGRAPH, PermNet, Puck , Blanche, CFinder, KeyPlayer, KliqFinder, Network…	SNAP, InFlow, STRUCTUREand ORA
Database	Included	Excluded
HMIC	UCINET, NetDraw, KrackPlot, NetMiner, StOCNET, GRADAP, NEGOPY, FATCAT, MultiNet, Agna, Blue Spider, DyNet, MDLogix Solutions, Network Workbench, Pajek, Sentinel Visualizer, SocNetV, visone, CID-ABM, C-IKNOW, Commetrix, MetaSight, Referral Web, SONIVIS, UNISon, CiteSpace, E-Net, Ego Net, VennMaker, Financial Network Analyzer, PGRAPH, PermNet, Puck , Blanche, CFinder, KeyPlayer, KliqFinder, Network…	SNAP, InFlow, STRUCTURE and ORA
Web of Science	UCINET, NetDraw, KrackPlot, NetMiner, StOCNET, GRADAP, NEGOPY, FATCAT, MultiNet, Agna, Blue Spider, DyNet, MDLogix Solutions, Network Workbench, Pajek, Sentinel Visualizer, SocNetV, visone, CID-ABM, C-IKNOW, Commetrix, MetaSight, Referral Web, SONIVIS, CiteSpace, E-Net, Ego Net, VennMaker, Financial Network, Analyzer, PGRAPH, PermNet, CFinder, KeyPlayer, KliqFinder, Network Genie, ONA surveys, No…	SNAP, InFlow, STRUCTURE, ORA, Puck and ORS
The Cochrane Library	UCINET, NetDraw, KrackPlot, NetMiner, StOCNET, GRADAP, STUCTURE, NEGOPY, FATCAT, MultiNet, Agna, Blue Spider, DyNet, MDLogix Solutions, Network Workbench, ORA, Pajek, Sentinel Visualizer, SocNetV, visone, CID-ABM, C-IKNOW, Commetrix, MetaSight, Referral Web, SONIVIS, UNISoN, CiteSpace, E-Net, Ego Net,VennMaker, Financial Network Analyzer, PGRAPH, Puck, Blanche, PermNet, PNet, CFinder, KeyPlayer, …	SNAP, InFlow and ORS
Popline	UCINET, NetDraw, KrackPlot, NetMiner, StOCNET, GRADAP,NEGOPY, FATCAT, MultiNet, Agna, Blue Spider, DyNet, MDLogix Solutions,Network Workbench, ORA, Pajek, Sentinel Visualizer, SocNetV, visone, CIDABM, CIKNOW, Commetrix, MetaSight, SONIVIS, CiteSpace, ENet, Ego Net, VennMaker, Financial Network Analyzer, PGRAPH, Puck, Blanche, PermNet, CFinder, KeyPlayer, KliqFinder, Network Genie,ONA Surveys, Nod…	SNAP, InFlow, STRUCTURE and ORS
