# Supplementary material for: Use of social network analysis methods to study professional advice and performance among healthcare providers: a systematic review
Source: Syst Rev. 2017 Oct 23;6:208. doi: 10.1186/s13643-017-0597-1 (PMC5651641; doi:10.1186/s13643-017-0597-1)
Supplement: Supplementary file 5 — Critical appraisal tool for qualitative studies. (XLSX 13 kb) [file 13643_2017_597_MOESM5_ESM.xlsx]

## Sheet: CA Tool Qual
Additional File 5: Critical Appraisal Tool for Qualitative Studies
Critical sppraisal for qualitative study (or study component)		Reviewer 1		Reviewer 2		Reconciliation
	Theoretical Approach	Yes No Unclear	Comments	Yes No Unclear	Comments	Yes No Unclear	Comments
1	Is a qualitative approach appropriate? (yes= research question sought to understand processes, structure or illuminate subjective experiences or meanings)
2	Were the research aims/objectives/ research questions clearly stated?
3	Were the values/assumptions/theory underpinning the study design approach discussed and justified? ( look for: grounded theory, discourse analysis, ethnography, phenomenology, content analysis)
	Study design
4	Was the research design/methodology rigorous? (were the methods clearly linked to the theory/research question? was there a clear rationale/justification for the setting? Was participant recruitment method discussed (face to face, telephone, e-mail, mail, etc)? Was sampling strategy clear and justified ( purposive, convenience, consecutive, snowball)? Was the data collection method well described…
5	Were there adequate number of participants? Were any refusals or drop outs reported? Were reasons given and reported?
	Data Collection
6	Are the data collection methods clearly described? (tools provided, were the methods/tools piloted? If they changed over time was this evolution described and justified? form of data collected clear i.e. field notes, audio/video recordings, etc)
7	Were the data collected appropriate to address the research questions?
8	Was the observation period/data collection period adequate? (did the author discuss saturation?)
	Validity
9	Is the study setting and context clearly described?
Critical sppraisal for qualitative study (or study component)		Reviewer 1		Reviewer 2		Reconciliation
	Validity	Yes No Unclear	Comments	Yes No Unclear	Comments	Yes No Unclear	Comments
10	Was context bias considered? (did the authors consider the influence of the setting where the study took place?)
11	Were the methods reliable? (used in previous studies for similar purpose, were there efforts to address data quality, i.e.triangulate data, respondent validation, repeat interviews)
	Analysis
12	Are the data "rich"? (yes= clear level of detail, diverity of perspective and content explored, responses compared/contrasted across groups, etc)
13	Is the analysis reliable? (Yes= more than one researcher coded transcripts/data, description of how differences were resolved, clear how themes/concepts were derived from the data, role of the researcher and their potential bias and influence through the study considered (reflexivity), relationship between the researcher and participants described and considered, respondent validation verified fi…
14	Are the findings clearly presented? If sufficient data presented to support the findings? Are data that contradict the findings discussed and presented?
15	Are extracts from the original data included (direct quotes from participants)
	Conclusions
16	Is there a clear link between research question, theory, data, interpretation and conclusions?
17	Have alternative explanations been explored and discounted?
18	Were other studies with similar/different results discussed?
19	Are the implications of the research clearly identified? ( Is generalisability/external validity discussed? ) Are future directions for research discussed?
20	Is there discussion of study limitations?
	Ethics
21	Was the study approved by an ethics committee?
Critical sppraisal for qualitative study (or study component)		Reviewer 1		Reviewer 2		Reconciliation
	Ethics	Yes No Unclear	Comments	Yes No Unclear	Comments	Yes No Unclear	Comments
22	Has the relationship between the researcher and participants been described?
23	Is how the research was explained and presented to the participants described?
24	Is the funding source for the study clearly stated
25	Were researcher qualifications/credentials given?
	Overall assessment of study quality
	Note: High quality (++): Majority of criteria met. Little or no risk of bias. Results unlikely to be changed by further research (rough guidance-- "yes" for 75% of 25 question categories). Acceptable (+): Most criteria met. Some flaws in the study with an associated risk of bias, Conclusions may change in the light of further studies. (rough guidance-- "yes" for 50-75% of 25 question categories) …	++/+/0		++/+/0		++/+/0
