# Supplementary material for: Use of social network analysis methods to study professional advice and performance among healthcare providers: a systematic review
Source: Syst Rev. 2017 Oct 23;6:208. doi: 10.1186/s13643-017-0597-1 (PMC5651641; doi:10.1186/s13643-017-0597-1)
Supplement: Supplementary file 7 — Data extraction tool. (XLSX 11 kb) [file 13643_2017_597_MOESM7_ESM.xlsx]

## Sheet: Data Extraction Tool
Additional File 7: Data Extraction Tool
Data Extraction Tool
Information to extract	Reviewer 1		Reviewer 2		Reconciliation
	Extraction	Comments	Extraction	Comments	Extraction	Comments
ID Number
DOI Number
Title
Authors
Publication Date
Type of Publication (journal article, report, etc)
Name of Publication (journal name/website, etc)
Setting (Country/Countries)
Health system level (PHC, district, …)
Health area
Health intervention/innovation
Type of Health Care Worker population (i.e. nurses or non-physician clinicians)
Number of health care workers included in study
Patient population (if specific)
Patient outcomes captured
Study objective/ focus of network study (networks captured)
Study design (observational/experimental/longitudinal/cross-sectional, etc)
Study duration (length of data collection period)
Study timeframe (time frame data collected covers)
Unit of analysis
Research question(s)
Social network analysis methods
Data collection method
Boundary specification method/ sampling (if applicable)
Network category studied (whole network/egocentric network)
Response rate
Network metrics used
Software
Network map (Yes/No)
Results/conclusion
Recommendations for further research
Network intervention (yes/no)
Policy change or research implications
Study limitations
